# Supplementary material for: A molecular phylogenetic appraisal of the acanthostomines Acanthostomum and Timoniella and their position within Cryptogonimidae (Trematoda: Opisthorchioidea)
Source: PeerJ journal article supplement (doi:10.7717/peerj.4158), 2017-12-11

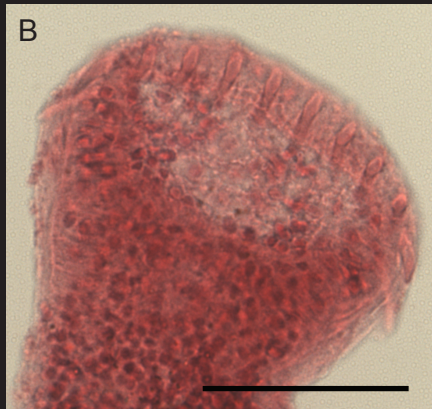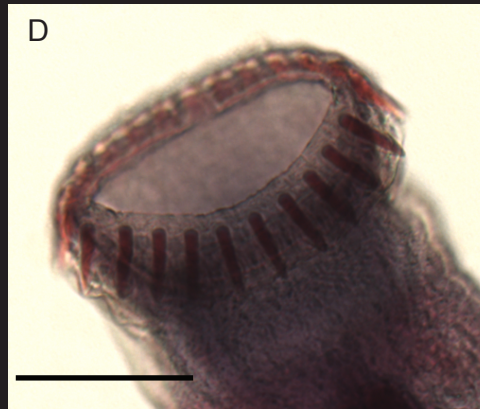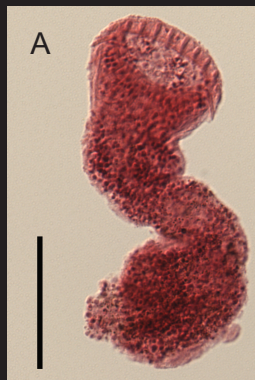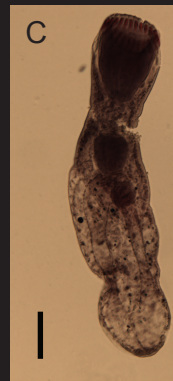

Supplement: Figure_S1.pdf [file Figure_S1.pdf]
